# Supplementary material for: Prenatal and postnatal exposure to Bisphenol A and Asthma: a systemic review and meta-analysis
Source: PubMed Central journal article supplement — J Thorac Dis. 2021 Mar;13(3):1684–96. doi: 10.21037/jtd-20-1550 (PMC8024800; doi:10.21037/jtd-20-1550), 2021-03
Supplement: jtd-13-03-1684-supplementary.pdf [file jtd-13-03-1684-supplementary.pdf]

Table S1 Quality Assessment of Included Studies using the NOS tool<sup>#</sup>

| Author/year/country  | Overall quality assessment | Selection                                |                                     |                           | Demonstration that outcome of interest was not present at start of study | Comparability                                                   | Outcome               |                                                 |                                  |
|----------------------|----------------------------|------------------------------------------|-------------------------------------|---------------------------|--------------------------------------------------------------------------|-----------------------------------------------------------------|-----------------------|-------------------------------------------------|----------------------------------|
|                      |                            | Representativeness of the exposed cohort | Selection of the non-exposed cohort | Ascertainment of exposure |                                                                          | Comparability of cohorts on the basis of the design or analysis | Assessment of outcome | Follow-up was long enough for outcomes to occur | Adequacy of follow-up of cohorts |
| Berger K/2019/USA    | 8                          | *                                        | *                                   | *                         | *                                                                        | *                                                               | —                     | *                                               | *                                |
| Buckley JP/2018/USA  | 8                          | *                                        | *                                   | *                         | *                                                                        | *                                                               | —                     | *                                               | *                                |
| Vernet C/2017/France | 8                          | *                                        | *                                   | *                         | *                                                                        | *                                                               | —                     | *                                               | *                                |
| Wang IJ/2016/China   | 8                          | *                                        | *                                   | *                         | *                                                                        | *                                                               | —                     | *                                               | *                                |
| Gascon M/2015/Spain  | 8                          | *                                        | *                                   | *                         | *                                                                        | *                                                               | —                     | *                                               | *                                |
| Spanier AJ/2014/USA  | 8                          | *                                        | *                                   | *                         | *                                                                        | *                                                               | —                     | *                                               | *                                |
| Kim KN/2014/Korea    | 8                          | *                                        | *                                   | *                         | *                                                                        | *                                                               | —                     | *                                               | *                                |
| Donohue KM/2013/USA  | 9                          | *                                        | *                                   | *                         | *                                                                        | *                                                               | *                     | *                                               | *                                |
| Spanier AJ/2012/USA  | 8                          | *                                        | *                                   | *                         | *                                                                        | *                                                               | —                     | *                                               | *                                |

<sup>#</sup>, the New Castle-Ottawa Scale for cohort studies. The score ranges from 0 to 9.

**Table S2** Limitations of included studies

| Source            | limitations                                                                                                                                                                                                                                                                                                                                                                                                                                                                                                                                                                                           |
|-------------------|-------------------------------------------------------------------------------------------------------------------------------------------------------------------------------------------------------------------------------------------------------------------------------------------------------------------------------------------------------------------------------------------------------------------------------------------------------------------------------------------------------------------------------------------------------------------------------------------------------|
| Berger K (2019)   | The researchers cannot differentiate atopic and nonatopic cases, some of the probable asthma cases may be nonatopic.<br>The result cannot generalize to other population.<br>The study is based on small sample size                                                                                                                                                                                                                                                                                                                                                                                  |
| Buckley JP (2018) | The researchers assess exposure based on a spot urine sample collected during the third trimester, may cause misclassified exposure.<br>The result lack of information on postnatal exposure. The study did not have adequate sample size.<br>The study lack of clinical confirmation of outcomes.<br>The researchers failed to follow up and this may lead to selection bias. The result cannot generalize to other population.<br>Sample BPA level may not represent recent exposure                                                                                                                |
| Vernet C (2017)   | The researchers were unable to differentiate bronchiolitis and bronchitis occurrences. The result cannot generalize to girls.<br>There is limited sample size.<br>The study did not consider the well-known wheezing phenotypic heterogeneity. The single sample contributes to exposure misclassification.<br>There is no information on postnatal exposures                                                                                                                                                                                                                                         |
| Wang IJ (2016)    | The exposure based on a spot urine sample collected during the third trimester, may cause misclassified exposure .<br>Lack of data on prenatal BPA exposure and cross section design may limit conclusion.<br>There is potential selection bias                                                                                                                                                                                                                                                                                                                                                       |
| Gascon M (2015)   | The researchers failed to follow up                                                                                                                                                                                                                                                                                                                                                                                                                                                                                                                                                                   |
| Spanier AJ (2014) | A spot urine sample may cause misclassified exposure.<br>Lung function assessment, FEV1, which cannot be available for all the children participated in the study ,cannot predict future lung function and distinguish the effects of BPA.<br>The children who can provide FEV1 result have poorer lung function than children's as reference sample. Parent-report outcomes lead to under or over reported wheeze.<br>Confounders influence the generalizability of the results.<br>Samples recruited in the study were limited to English speaking families. Concurrent exposure may affect results |
| Kim KN (2014)     | The study is on the basis of small sample size. The result cannot be generalized.                                                                                                                                                                                                                                                                                                                                                                                                                                                                                                                     |
| Donohue KM (2013) | The exposure based on a spot urine sample collected during the third trimester, may cause misclassified exposure.<br>Unmeasured confounding may affect the results.<br>There is wheeze outcome misclassification because of miss data. The researchers did not use bronchial provocation testing                                                                                                                                                                                                                                                                                                      |
| Spanier AJ (2012) | The study cannot place the three maternal measurements and the three creatinine concentrations in the same analysis.<br>BPA concentrations is changing over time, the collected sample may cause exposure classification.<br>Parent-report outcomes lead to under or over reported wheeze. The sample is not a random sample.<br>There was differential attrition in the study                                                                                                                                                                                                                        |

**Table S3** Publication bias of each subgroup using Stata SE12.0

| Subgroup               | Included datas | Begg's test | Egger's test |
|------------------------|----------------|-------------|--------------|
| Prenatal BPA-asthma    | 5              | 1           | 0.793        |
| Prenatal BPA-wheeze    | 5              | 0.592       | 0.528        |
| Prenatal BPA-gestation | 2              | 1           | 0.517        |
| Postnatal BPA-asthma   | 3              | 0.133       | 0.056        |
| Postnatal BPA-wheeze   | 3              | 0.806       | 0.317        |

All studies were without publication bias ( $P>0.05$ ).

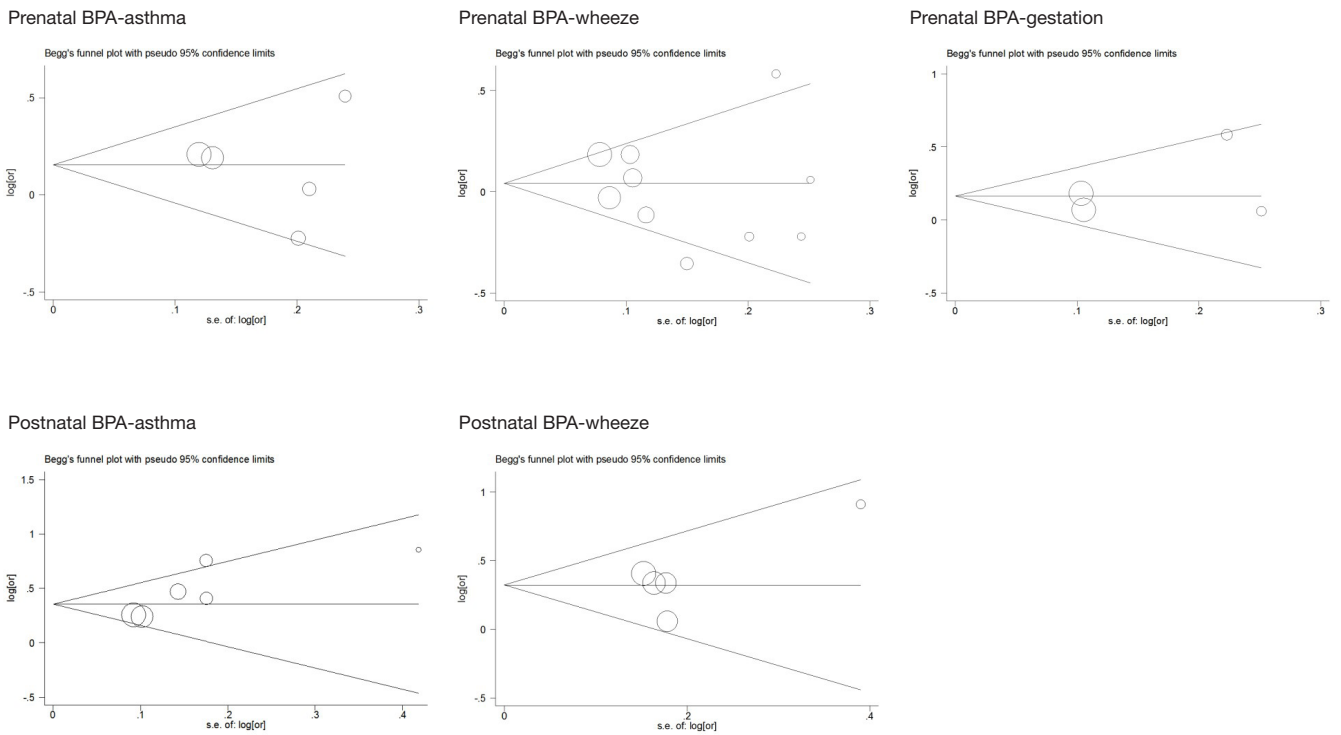

**Figure S1** Begg's test of each included studies in all meta-analysis.
